# Supplementary material for: Extracellular vesicles derived from endothelial cells modulate macrophage phenotype in vitro
Source: Springer Nature journal article supplement (doi:10.1186/s40001-023-01427-6), 2023-11-09

GAPDH

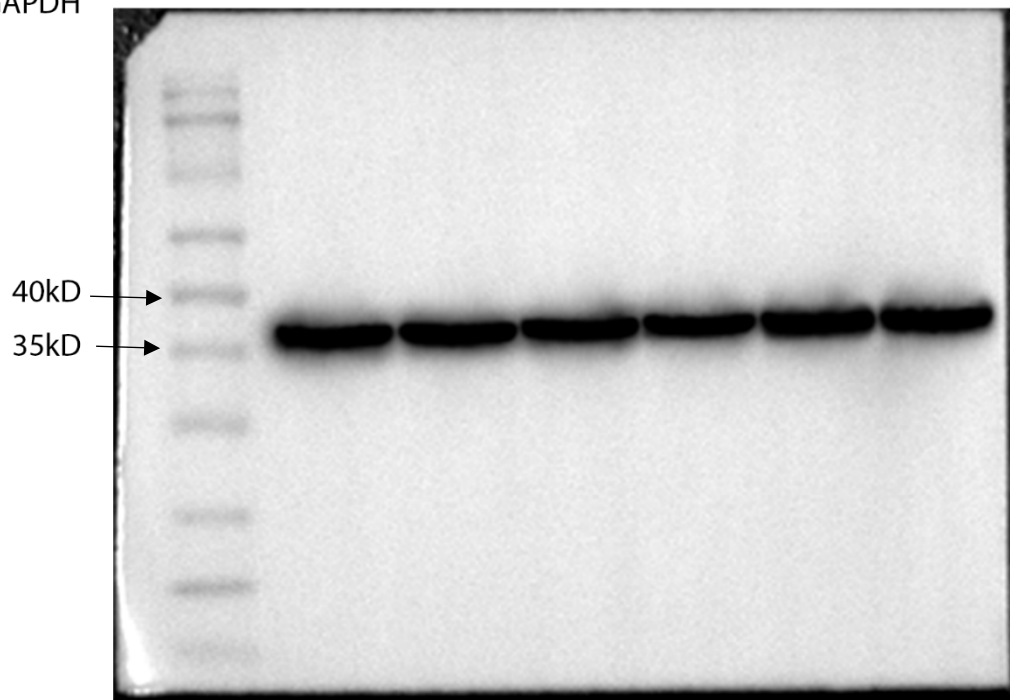

TLR4

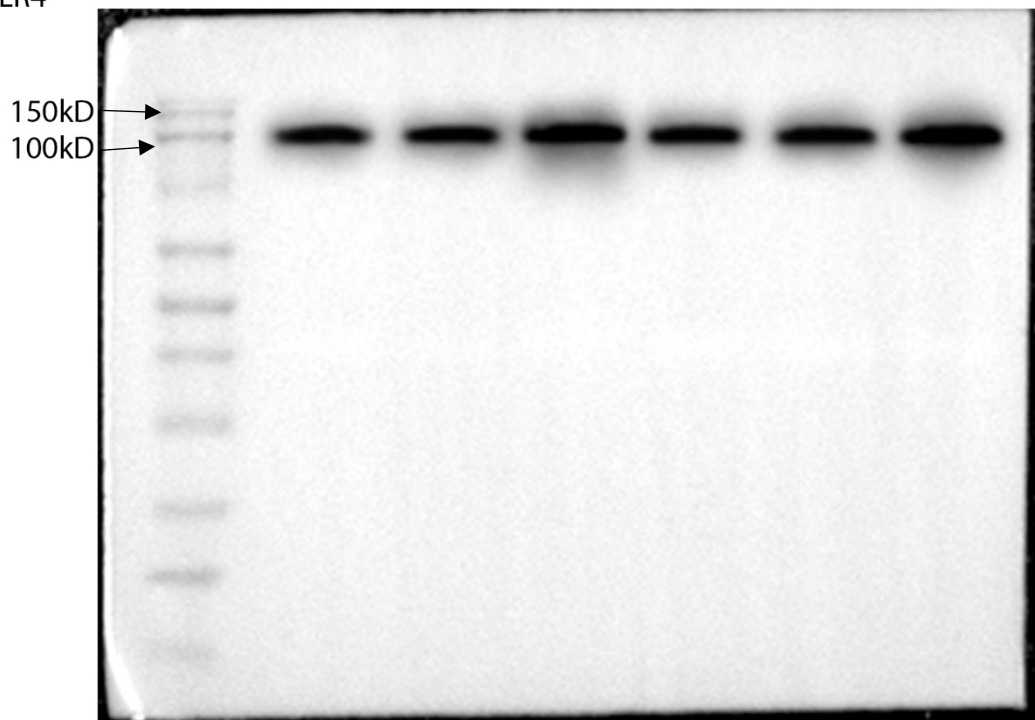

p-NFκB-p65

70kD →

50kD →

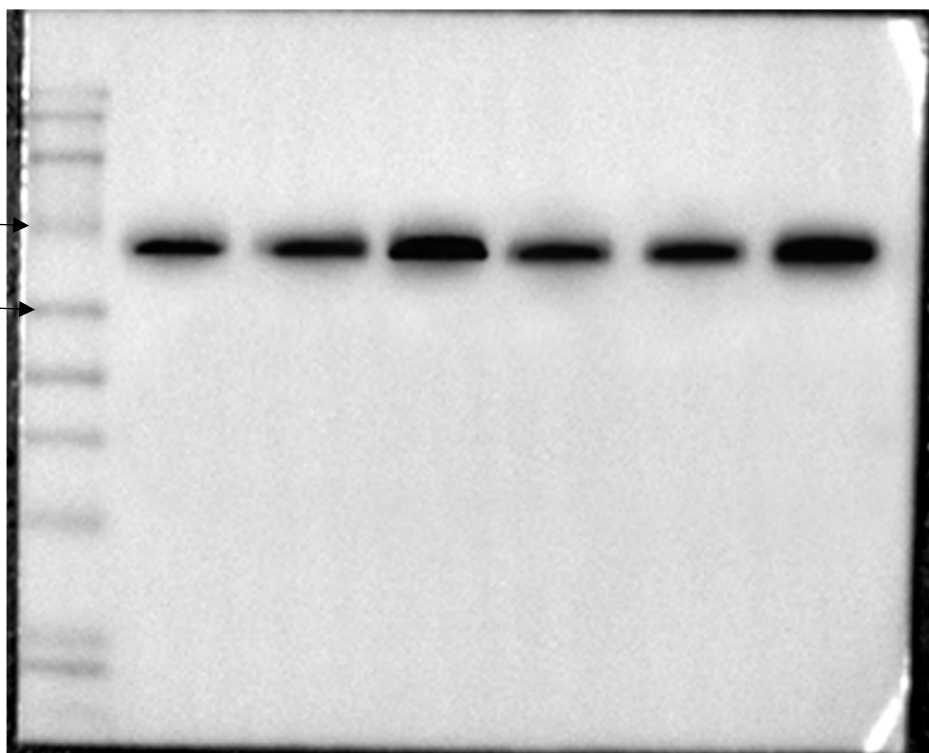

CD31

150kD

100kD

70kD

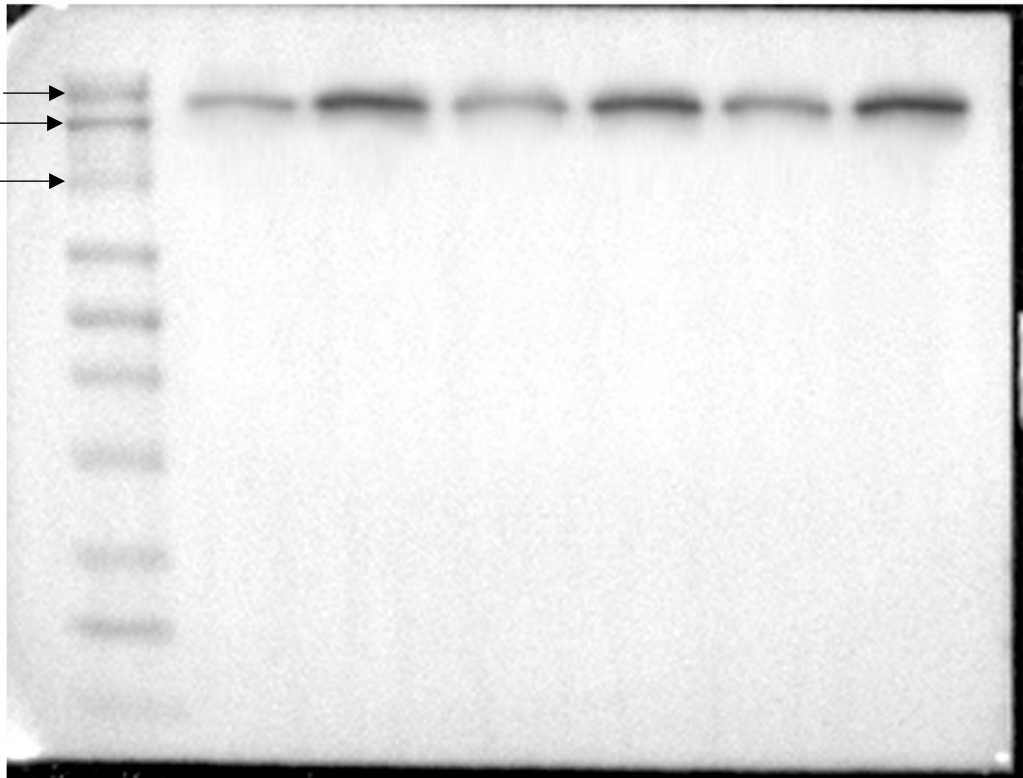

CD63

60kD

40kD

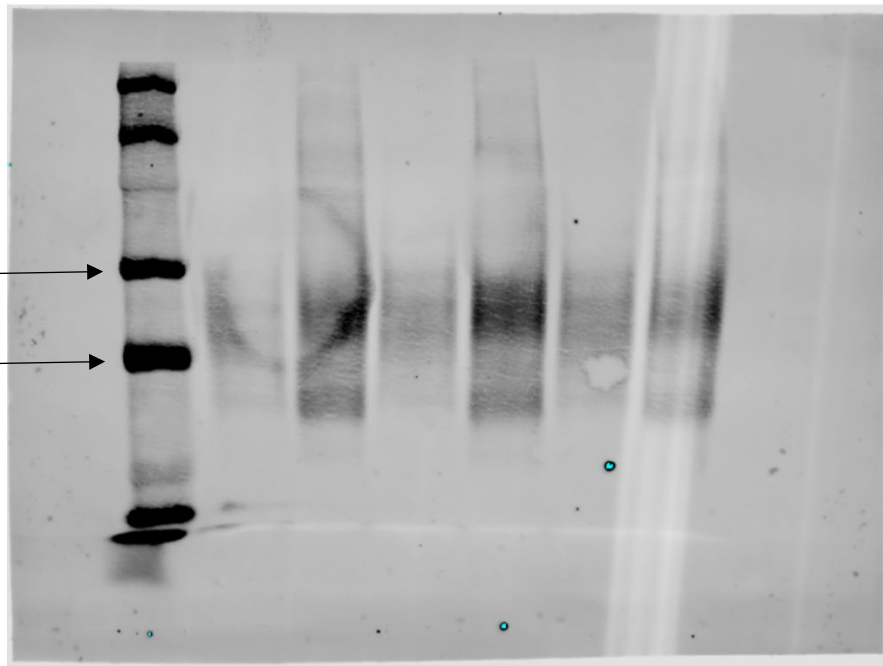

Supplement: MOESM1 [file 26285232]
